# Supplementary material for: Structure and catalytic activity of ultrasmall Rh, Pd and (Rh + Pd) nanoparticles obtained by mediated electrosynthesis
Source: Royal Society of Chemistry journal article supplement (doi:10.1039/c8nj06233a), 2019-01-01
Supplement: c8nj06233a1.pdf [file c8nj06233a1.pdf]

## Supplementary information

### **Structure and catalytic activity of ultrasmall Rh, Pd and (Rh + Pd) nanoparticles obtained by mediated electrosynthesis**

**Vitaliy V. Yanilkin,<sup>a</sup> Natalya V. Nastapova,<sup>a</sup> Gulnaz R. Nasretdinova,**

**<sup>a</sup> Yury N. Osin,<sup>b</sup> Vladimir G. Evtjugin,<sup>b</sup>**

**Albina Yu. Ziganshina,<sup>a</sup> Aidar T. Gubaidullin<sup>a</sup>**

*<sup>a</sup> Arbuzov Institute of Organic and Physical Chemistry, FRC Kazan Scientific Center, Russian Academy of Sciences, Arbuzov St. 8, 420088 Kazan, Russia*

*<sup>b</sup> Kazan Federal University, Interdisciplinary Center “Analytical Microscopy”, Kremlevskaya St. 18, 420018 Kazan, Russia*

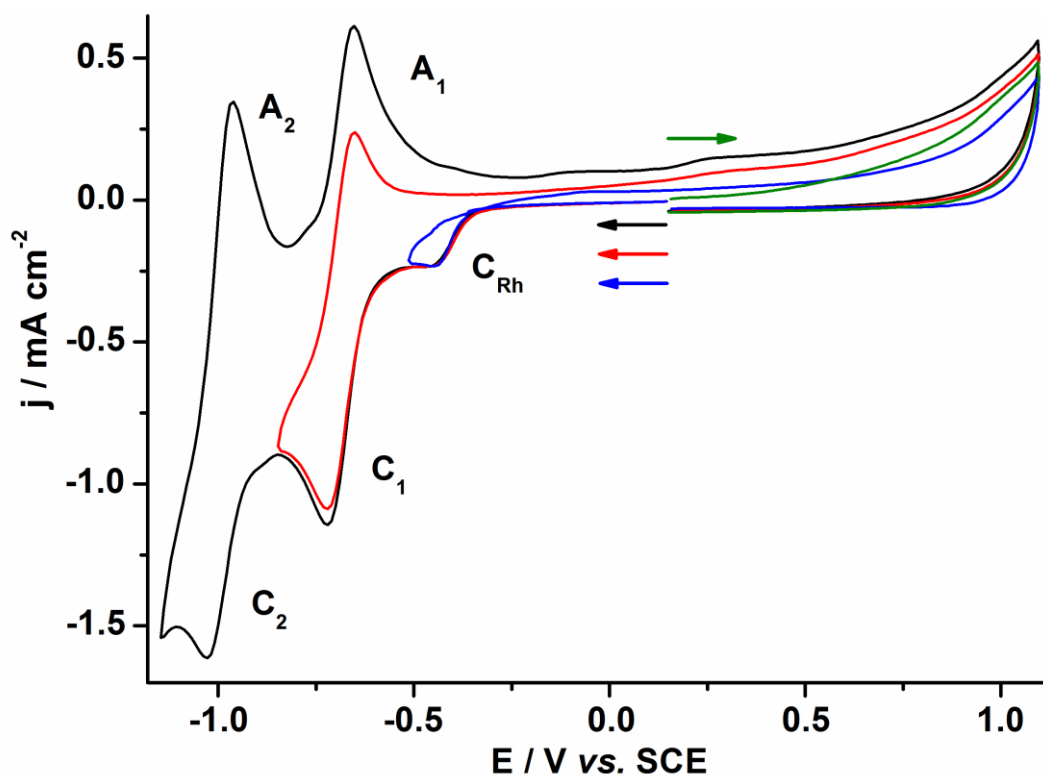

**Fig. S1.** CV curves of the  $\{[\text{RhCl}_6]^{3-} (1.5 \text{ mM}) - \text{MV}^{2+} (3 \text{ mM}) - \text{CTAC} (10 \text{ mM})\}$  system with the potential scan in negative and positive directions. GC,  $\text{H}_2\text{O}/0.1 \text{ M KCl}$ ,  $v = 100 \text{ mV/s}$ .

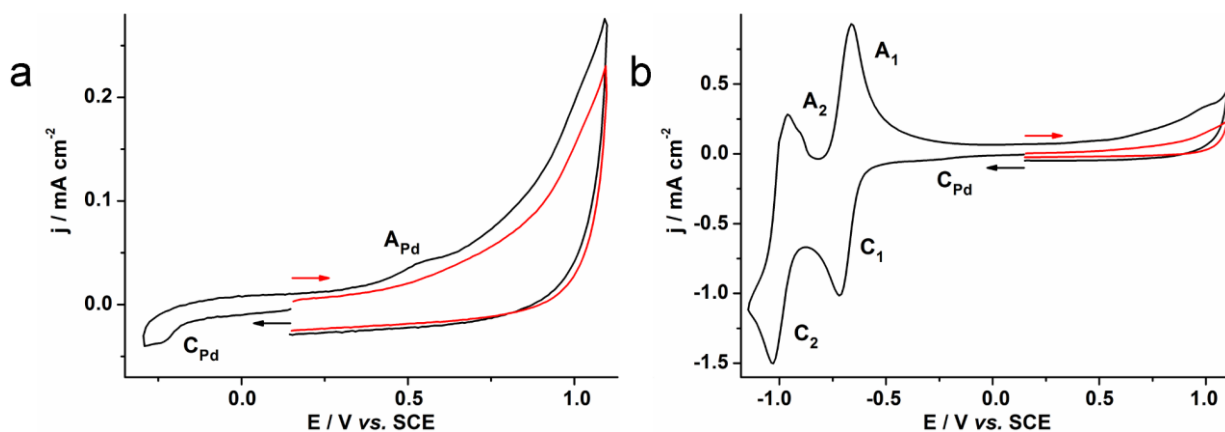

**Fig. S2.** CV curves of the  $\{[\text{PdCl}_4]^{2-} (1.5 \text{ mM}) - \text{CTAC} (10 \text{ mM})\}$  (a) and  $\{[\text{PdCl}_4]^{2-} (1.5 \text{ mM}) - \text{MV}^{2+} (3 \text{ mM}) - \text{CTAC} (10 \text{ mM})\}$  (b) systems with the potential scan in negative and positive directions. GC,  $\text{H}_2\text{O}/0.1 \text{ M KCl}$ ,  $v = 100 \text{ mV/s}$ .

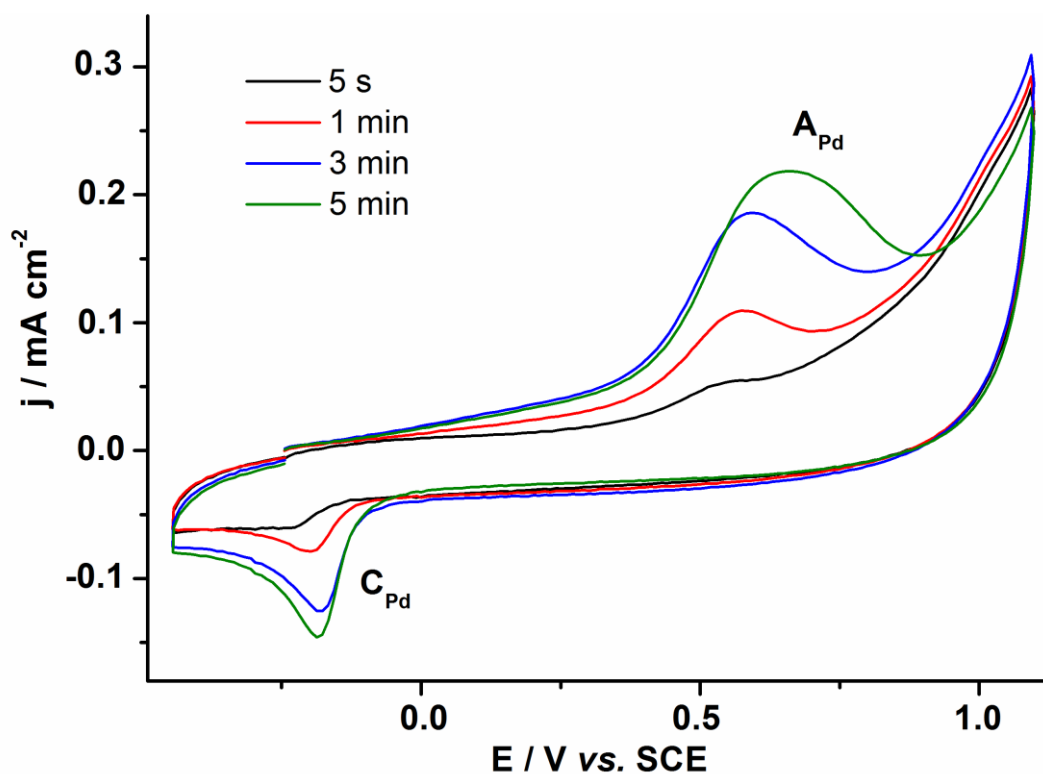

**Fig. S3.** CV curves of the {[PdCl<sub>4</sub>]<sup>2-</sup> (1.5 mM) – CTAC (10mM)} system after microelectrolysis at E = -0.25 V for various periods. GC, H<sub>2</sub>O/0.1 M KCl, v = 100 mV/s.

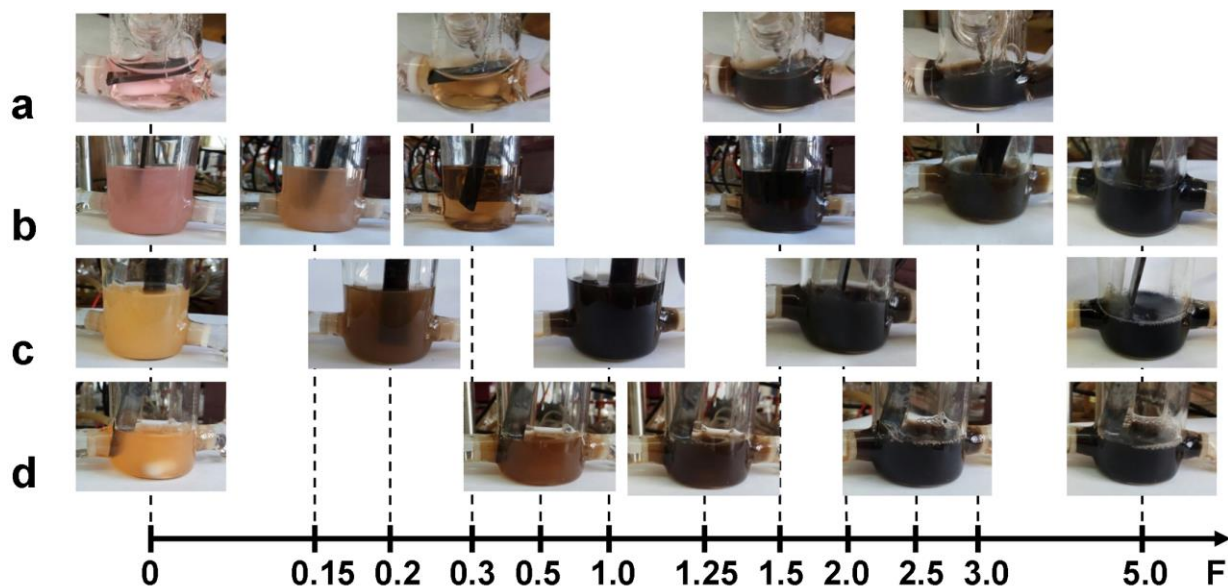

**Fig. S4.** Photos of solutions in the electrolysis cell after passing various amounts of electricity (F number with respect to metal ions) during electrosynthesis of MNPs in the presence of PVP (a) and CTAC (b-d): Rh (a,b), (Rh/Pd) (b), Pd, (Pd/Rh) (c), (Pd-Rh) (d). The F axis is not scaled, is given for clarity.

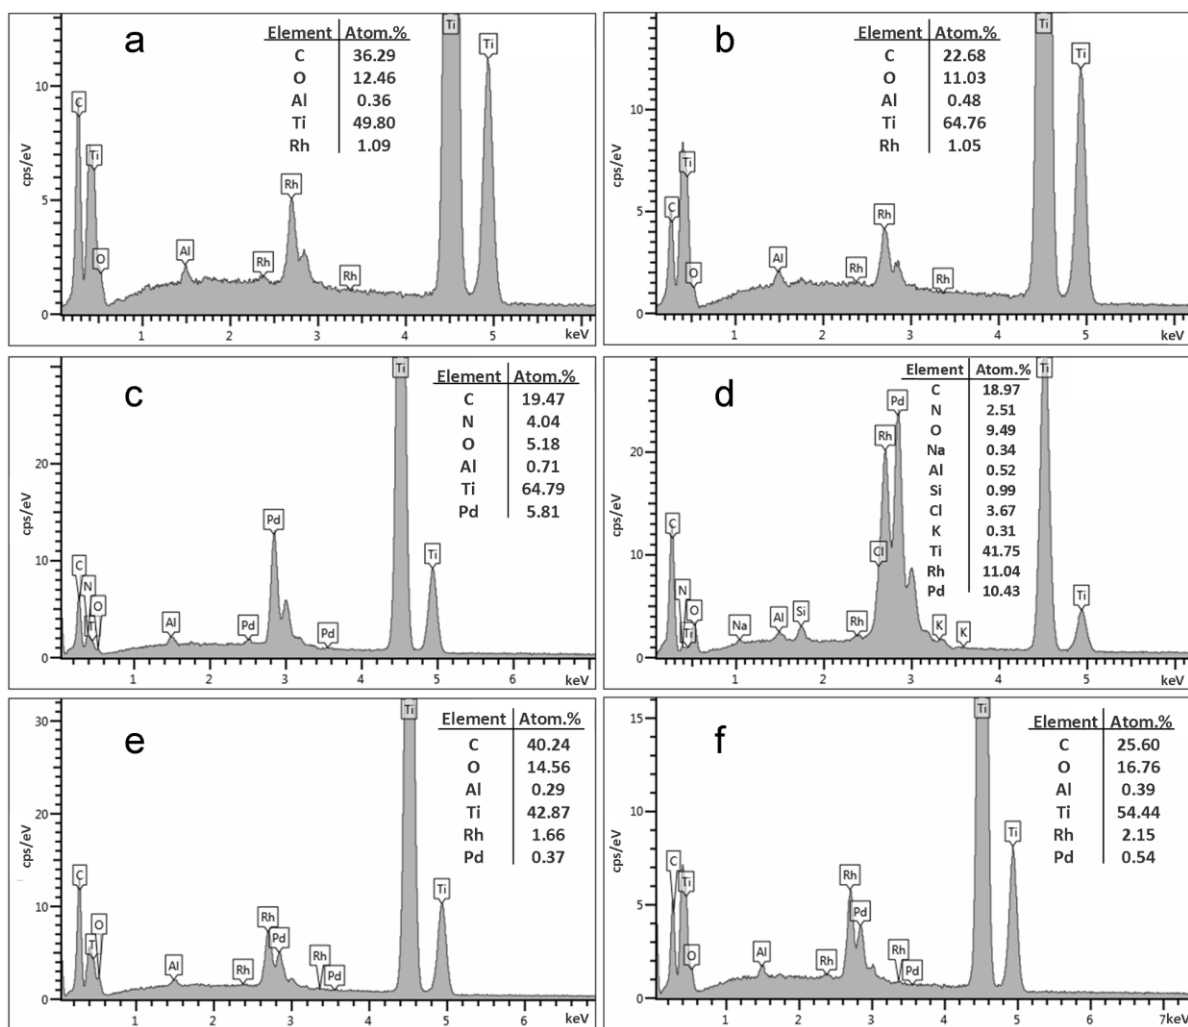

**Fig. S5.** Energy-dispersion spectra of MNPs in a stabilizer shell: RhNPs – PVP (a), RhNPs – CTAC (b), PdNPs – CTAC (c), (Rh/Pd)NPs – CTAC (d), (Pd/Rh)NPs – CTAC (e), (Pd-Rh)NPs – CTAC (f) obtained by SEM (Al and Ti peaks are from the support).
